# Supplementary material for: Parallel HIV-1 fitness landscapes shape viral dynamics in humans and macaques that develop broadly neutralizing antibodies
Source: eLife. 2025 Nov 10;14:RP105466. doi: 10.7554/eLife.105466 (PMC12600013; doi:10.7554/eLife.105466)
Supplement: Supplementary file 1. [file elife-105466-supp1.xlsx]

## Sheet: CH103_CH235 Resistance
Mutation	Note
T234N	Increases resistance to CD4BS Abs including CH235 (Bricault 2019)
E275K	Mutation combination E275K+N279D+V281S escape from CH235 (Gao 2014)
E279D	Mutation combination E275K+N279D+V281S escape from CH235 (Gao 2014)
N279K	Mutation combination E275K+N279D+V281S escape from CH235 (Gao 2014)
N280S	Mutation combination N280S+V281A escape from CH235 (Gao 2014)
N280T	Mutation combination N280T+V281A escape from CH235 (Gao 2014)
V281A	Mutation combination V281A+V281G+V281D escape from CH235 (Gao 2014)
V281G	Mutation combination V281A+V281G+V281D escape from CH235 (Gao 2014)
V281D	Mutation combination V281A+V281G+V281D escape from CH235 (Gao 2014)
V281S	Mutation combination E275K+N279D+V281S escape from CH235 (Gao 2014)
V281S	Mutation combination E275K+N279D+V281S escape from CH235 (Gao 2014)
S365P	Complete escape from CH103 (Gao 2014)
K460E	Resistance to CH235 lineage in CH505 and RM6072 (Roark 2021)
460-465X	V5 insertion increases resistance to CH103 (Gao 2014)
