# Supplementary material for: Parallel HIV-1 fitness landscapes shape viral dynamics in humans and macaques that develop broadly neutralizing antibodies
Source: eLife. 2025 Nov 10;14:RP105466. doi: 10.7554/eLife.105466 (PMC12600013; doi:10.7554/eLife.105466)
Supplement: Supplementary file 2. [file elife-105466-supp2.xlsx]

## Sheet: CH505 Resistance Mutations
Mutation	Note
132-152X	V1 insertion increases resistance to intermediate CH103 lineage (Gao 2014)
X197N	Loss of an N-linked glycan leads to loss of resistance to intermediate CH235 lineages (Labranché 2019)
X276N	Loss of an N-linked glycan leads to loss of resistance to intermediate CH235 lineages (Labranché 2019)
N279A	Resistant to UCA and intermediate CH235 lineage (Labranché 2019)
N279C	Resistant to UCA and intermediate CH235 lineage (Labranché 2019)
N279E	Resistant to UCA and intermediate CH235 lineage (Labranché 2019)
N279V	Resistant to UCA and intermediate CH235 lineage (Labranché 2019)
N279S	Resistant to UCA and intermediate CH235 lineage (Labranché 2019)
N279T	Resistant to UCA and intermediate CH235 lineage (Labranché 2019)
N279H	Resistant to UCA and intermediate CH235 lineage (Labranché 2019)
N280D	Resistant to UCA and intermediate CH235 lineage (Bricault 2019)
X293T	Resistant to UCA and intermediate antibodies (Labranché 2019)
X293S	Resistant to UCA and intermediate antibodies (Labranché 2019)
X362N	Loss of an N-linked glycan leads to loss of resistance to intermediate CH235 lineages (Labranché 2019)
G458Y	Resistant to UCA of CH235 lineage (Labranché 2019; Saunders 2019)
G458F	Resistant to UCA of CH235 lineage (Labranché 2019)
G458W	Resistant to UCA of CH235 lineage (Labranché 2019)
G458R	Resistant to UCA of CH235 lineage (Labranché 2019)
G458K	Resistant to UCA of CH235 lineage (Labranché 2019)
G458S	Resistant to UCA of CH235 lineage (Labranché 2019)
G458D	Resistant to UCA and intermediate CH235 lineage (Labranché 2019)
G458E	Resistant to UCA and intermediate CH235 lineage (Labranché 2019)
X461N	Loss of an N-linked glycan leads to loss of resistance to intermediate CH235 lineages (Labranché 2019)
X462N	Loss of an N-linked glycan leads to loss of resistance to intermediate CH235 lineages (Labranché 2019)
