# Supplementary material for: Parallel HIV-1 fitness landscapes shape viral dynamics in humans and macaques that develop broadly neutralizing antibodies
Source: eLife. 2025 Nov 10;14:RP105466. doi: 10.7554/eLife.105466 (PMC12600013; doi:10.7554/eLife.105466)
Supplement: Supplementary file 3. [file elife-105466-supp3.xlsx]

## Sheet: CH848 Resistance Mutations
Mutation	Note
E87K	Resistance to DH272 lineage (Bonsignori 2017)
E87D	Resistance to DH272 lineage (Bonsignori 2017)
E87G	Resistance to DH475 lineage (Bonsignori 2017)
D185N	Resistance to DH272 and DH475 lineages (Bonsignori 2017)
D185S	Resistance to DH272 and DH475 lineages (Bonsignori 2017)
G300N	Resistance to DH272 and DH475 lineages (Bonsignori 2017)
N301H	Resistant to intermediate DH270 (Henderson 2023)
V323X	Recognized by intermediate antibody DH270.I5 (Henderson 2023)
D325N	Resistance to DH272 lineage (Bonsignori 2017; Henderson 2023)
V326X	Recognized by intermediate antibody DH270.I5 (Henderson 2023)
P326X	Recognized by intermediate antibody DH270.I5 (Henderson 2023)
T326X	Recognized by intermediate antibodies DH270.I3 and DH270.I5 (Henderson 2023)
K327X	Resistance to intermediate antibody DH270.I5 (Henderson 2023)
E335K	Resistance to DH272 lineage (Bonsignori 2017)
E344K	Resistance to DH272 and DH475 lineages (Bonsignori 2017)
N413T	Resistance to DH272 and DH475 lineages (Bonsignori 2017)
D624G	Resistance to DH272 lineage (Bonsignori 2017)
I818L	Resistance to DH272 and DH475 lineages (Bonsignori 2017)
