# Supplementary material for: Parallel HIV-1 fitness landscapes shape viral dynamics in humans and macaques that develop broadly neutralizing antibodies
Source: eLife. 2025 Nov 10;14:RP105466. doi: 10.7554/eLife.105466 (PMC12600013; doi:10.7554/eLife.105466)
Supplement: Supplementary file 4. [file elife-105466-supp4.xlsx]

## Sheet: Beneficial Mutations CH505
Rank	Mutation (DNA)	Mutation (AA)	Date	Region	Selection coefficient (%)	Note
1	A7225G	N334S	113	Near V3 Loop	8.92	Reversion; N-linked glycan shift; resistance to DH950 antibodies (Saunders 2022)
2	T7066A	V281D	183	CD4bs/Loop D	5.66	Resistant to intermediate CH235 lineage antibodies; with N280S/T gives resistance to mature CH235 (Gao 2014)
3	G7776A	V518M	1093	Fusion Peptide	5.42
4	C6709T	T162I	129	V2 Loop	5.4	N-linked glycan hole
5	G6682A	G153E	71	V1 Loop	5.24	Reversion
6	C7462A	T413N	129	V4 Loop	5.16	N-linked glycan shift
7	C7468A	T415K	71	V4 Loop	4.82	Putative CD8+ T cell escape mutation (Gao 2014)
8	A7130C	K302N	183	V3 Loop	3.74	Reduces neutralization of DH950-like Abs (Saunders 2022)
9	G7769A	M515I	1603	Fusion Peptide	3.57	Reversion
10	A7614G	N464D	183	V5 Loop	3.46	Reversion
11	C7462T	T413I	23	V4 Loop	3.42	Putative CD8+ T cell escape mutation (Gao 2014)
12	G7776T	V518L	1640	Fusion Peptide	3.37
13	T7212C	Y330H	129	V3 Loop	3.28	Reversion; reduces neutralization of DH950-like Abs (Saunders 2022)
14	G6661A	S146N	129	V1 Loop	3.14	Reversion; N-linked glycan shield
15	G7453A	S410N	23	V4 Loop	3.08	Putative CD8+ T cell escape mutation (Liao 2013)
16	G6634T	S137I	183	V1 Loop	3	N-linked glycan hole
17	G6634C	S137A	129	V1 Loop	2.82	Reversion; N-linked glycan hole
18	T6588A	L122M	183	Near CD4bs	2.81
19	C7456A	T411K	29	V4 Loop	2.75	Reversion; N-linked glycan hole; putative CD8+ T cell escape mutation (Liao 2013)
20	A6596C	P124P	183	CD4bs	2.73
21	A7474G	H417R	23	V4 Loop	2.63	Putative CD8+ T cell escape mutation (Liao 2013)
22	A7601dG	N459D	1603	CD4bs	2.61	N-linked glycan shield; in CH235 antibody binding region (Liao 2013)
23	A7056T	T278S	1603	Loop D	2.59	Located in CH235 antibody binding region (Liao 2013)
24	G6630A	A136T	113	V1 Loop	2.59	Reversion
25	A8143G	N640S	1780	Near Glycosite	2.55
