# Supplementary material for: Parallel HIV-1 fitness landscapes shape viral dynamics in humans and macaques that develop broadly neutralizing antibodies
Source: eLife. 2025 Nov 10;14:RP105466. doi: 10.7554/eLife.105466 (PMC12600013; doi:10.7554/eLife.105466)
Supplement: Supplementary file 5. [file elife-105466-supp5.xlsx]

## Sheet: Beneficial Mutations CH848
Rank	Mutation (DNA)	Mutation (AA)	Date	Region	Selection coefficient (%)	Note
1	T9043G	S83A	49	Nef	12.55	Reversion
2	A8988cT	E65D	38	Nef	8.28
3	G8911A	E39K	38	Nef	6.68	Reversion
4	A8988bG	E65G	38	Nef	6.42
5	A8988cC	E65D	43	Nef	5.48
6	G6640A	S139N	358	V1 Loop	5.22	Reversion; N-linked glycan shift; presence of N-linked glycan at 138 decreases neutralization by early DH270 UCA and removes glycan at 137 (Saunders 2022)
7	G6679A	G152E	38	V1 Loop	4.83
8	C9044G	A84G	78	Nef	4.7	Reversion
9	A8915G	H41R	38	Nef	4.48	Reversion
10	A8083T	K620M	808	gp41	4.44
11	A8988cG	E65E	38	Nef	4.35
12	G7123A	S300N	700	V3 Loop	4.06	Reversion; confers resistance to DH272 and DH475 (Bonsignori 2017)
13	G6640T	S139V	445	V1 Loop	3.92	N-linked glycan hole
14	A7310C	K362N	780	V1 Loop	3.87	N-linked glycan shield
15	A8083C	K620T	780	gp41	3.84
16	A8912C	E40A	32	Nef	3.83
17	A8895G	A34A	49	Nef	3.77	Reversion
18	A8912T	E40V	43	Nef	3.74
19	G6640C	S139T	1432	V1 Loop	3.73	N-linked glycan shield
20	A6621C	N133H	1120	V1 Loop	3.66	N-linked glycan hole
21	G8911C	E39Q	49	Nef	3.64
22	C7066T	A281V	1651	CD4BS	3.62	Reversion
23	A6912G	N230D	194	Glycosite	3.57	N-linked glycan hole; amino acid N is sensitive to DH270.5 (Bricault 2019)
24	Δ8911G	Δ39E	78	Nef	3.57
25	A7614G	T464E	445	V5 Loop	3.39	Reversion; N-linked glycan hole
