# Supplementary material for: Parallel HIV-1 fitness landscapes shape viral dynamics in humans and macaques that develop broadly neutralizing antibodies
Source: eLife. 2025 Nov 10;14:RP105466. doi: 10.7554/eLife.105466 (PMC12600013; doi:10.7554/eLife.105466)
Supplement: Supplementary file 6. [file elife-105466-supp6.xlsx]

## Sheet: CH505 Sequence Stats
identifier	# of sequences	# of time points	# of variable sites	bnAbs detected	bnAb type
703010505	578	23	1131	Yes	CD4bs
RM5695	330	8	467	Yes	V2 Apex
RM6070	215	5	334	Yes	V2 Apex
RM6072	355	13	710	No
RM6697	228	6	386	No
RM6699	118	5	207	No
RM6701	98	5	148	No
RM6703	131	4	275	No
