# Supplementary material for: Parallel HIV-1 fitness landscapes shape viral dynamics in humans and macaques that develop broadly neutralizing antibodies
Source: eLife. 2025 Nov 10;14:RP105466. doi: 10.7554/eLife.105466 (PMC12600013; doi:10.7554/eLife.105466)
Supplement: Supplementary file 7. [file elife-105466-supp7.xlsx]

## Sheet: CH848 Sequence Stats
identifier	# of sequences	# of time points	# of variable sites	bnAbs detected	bnAb type
703010848	1205	31	2694	Yes	V3-glycan
RM6163	261	8	467	Yes	V3-glycan
RM6167	349	10	657	Yes	V3-glycan
RM6700	260	7	568	No
RM6713	281	7	567	No
RM6714	284	8	516	No
RM6720	193	8	340	No
