# Supplementary material for: Parallel HIV-1 fitness landscapes shape viral dynamics in humans and macaques that develop broadly neutralizing antibodies
Source: eLife. 2025 Nov 10;14:RP105466. doi: 10.7554/eLife.105466 (PMC12600013; doi:10.7554/eLife.105466)
Supplement: Supplementary file 8. [file elife-105466-supp8.xlsx]

## Sheet: Selected Mutations CH505
Rank	Mutation (AA)	Region	Selection coefficient (%)	Note
1	N334S	Near V3 Loop	2.44	N-linked glycan shift, enhanced viral replication (Bauer 2023), reduced early plasma neutralization (Roark 2021)
2	Y330H	V3 Loop	1.99	Improved virus entry and replication (Bauer 2023)
3	N279D	CD4BS	1.69	Enhanced replication (Bauer 2023), reduced early plasma neutralization, resistance to strain-specific CD4bs nAbs DH650 in RM6070 (Roark 2021)
4	K462E	V5 Loop	1.4
5	H356N	Glycosite	1.16
6	K302N	V3 Loop	1.15	Enhanced replication and affects virus entry; resistance to strain-specific V3 nAbs DH647 & DH648 (Bauer 2023)
7	G153E	V1 Loop	1.12
8	N130D	Near V1 Loop	0.99	Reduced early plasma neutralization (Roark 2021)
9	T234N	Glycosite	0.91	N-linked glycan shield; reduced early plasma neutralization; resistance to strain-specific CD4bs nAbs DH650 in RM6070 (Roark 2021)
10	H417R	V4 Loop	0.87	Enhanced replication (Bauer 2023); putative CD8+ T cell escape mutation (Roark 2021; Bauer 2023)
