# Supplementary material for: Parallel HIV-1 fitness landscapes shape viral dynamics in humans and macaques that develop broadly neutralizing antibodies
Source: eLife. 2025 Nov 10;14:RP105466. doi: 10.7554/eLife.105466 (PMC12600013; doi:10.7554/eLife.105466)
Supplement: Supplementary file 9. [file elife-105466-supp9.xlsx]

## Sheet: Strongly Selected Mutations (CH
Rank	Mutation (AA)	Region	Selection coefficient (%)	Note
1	P179L	V2 Loop	1.95
2	N413T	V4 Loop	1.7	N-linked glycan hole, loss of N413 alters sensitively to early nAbs in RM6167 (Roark2021)
3	N413S	V4 Loop	1.43	N-linked glycan hole, aids in antibody escape (Roark2021)
4	D137S	V1 Loop	1.29
5	N462T	V4 Loop	1.29	N-linked glycan shift
6	S407N	V4 Loop	1.22
7	R336E	Near V3 Loop	1.2	Mutations at site 336 observed in all RMs, R336G reduced sensitivity to plasma in RM6167 (Roark2021)
8	P179S	V2 Loop	1.18
9	V142fA	V1 Loop	1.15
10	N462D	V4 Loop	1.15	N-linked glycan hole
