# Supplementary material for: Parallel HIV-1 fitness landscapes shape viral dynamics in humans and macaques that develop broadly neutralizing antibodies
Source: eLife. 2025 Nov 10;14:RP105466. doi: 10.7554/eLife.105466 (PMC12600013; doi:10.7554/eLife.105466)
Supplement: Supplementary file 10. [file elife-105466-supp10.xlsx]

## Sheet: Selected Mutations (CH505)
Mutation	RM5695 (%)	RM6072 (%)	RM6701 (%)	RM6699 (%)	RM6697 (%)	RM6070 (%)	RM6703 (%)	Note
N130D	1.5	1.1			1	0.9	0.87	Confers resistance to V3 mAbs DH647 and DH648 in RM6072
R166K	0.49					1.77		Confers resistance to V2 apex bnAbs RHA1 in RM5695
R166S	0.7							Confers resistance to V2 apex bnAbs RHA1 in RM5695
R169K	0.43	-0.1				-0.04		Confers resistance to V2 apex bnAbs RHA1 in RM5695
T234N	0.36	4.5			0.34	1.1		Confers resistance to CD4bs mAbs DH650 in RM6072
N279K	1.2	0.013	-0.32	0.44	-0.19	-0.3		Confers resistance to CD4bs mAbs DH650 in RM6072
V281I	0.14	-0.03		0.59		1.4		Confers resistance to V3 mAbs DH647 and DH648 in RM6072
K302N	6.19	0.59			0.76			Confers resistance to V3 mAbs DH647 and DH648 in RM6072
Y330H	6.5	3	0.03	1.1	0.11	-0.56	1.4	Confers resistance to V3 mAbs DH647 and DH648 in RM6072
N334S	7.2	4.6	1.8	1.6	1.4	3.1	2.4	Confers resistance to V3 mAbs DH647 and DH648 in RM6072
