# Supplementary material for: Parallel HIV-1 fitness landscapes shape viral dynamics in humans and macaques that develop broadly neutralizing antibodies
Source: eLife. 2025 Nov 10;14:RP105466. doi: 10.7554/eLife.105466 (PMC12600013; doi:10.7554/eLife.105466)
Supplement: Supplementary file 11. [file elife-105466-supp11.xlsx]

## Sheet: Selected Mutations (CH848)
Mutation	RM6163 (%)	RM6167 (%)	RM6700 (%)	RM713 (%)	RM6714 (%)	RM6720 (%)	Note
N332S		-0.19					Mutations at or near N332 to 334 can modulate sensitivity to neutralization
R336G	0.62	0.4	0.94	0.24	0.12	0.98	Led to a reduction in neutralization by autologous nAb in RM6167
