# Supplementary material for: Parallel HIV-1 fitness landscapes shape viral dynamics in humans and macaques that develop broadly neutralizing antibodies
Source: eLife. 2025 Nov 10;14:RP105466. doi: 10.7554/eLife.105466 (PMC12600013; doi:10.7554/eLife.105466)
Supplement: Supplementary file 12. [file elife-105466-supp12.xlsx]

## Sheet: Sheet
HXB2 Site
N130
T234
N279
V281
N300
K302
Y330
N334
K347
H355
T413
H417
G471
G620
E649
