# Supplementary material for: Parallel HIV-1 fitness landscapes shape viral dynamics in humans and macaques that develop broadly neutralizing antibodies
Source: eLife. 2025 Nov 10;14:RP105466. doi: 10.7554/eLife.105466 (PMC12600013; doi:10.7554/eLife.105466)
Supplement: Supplementary file 13. [file elife-105466-supp13.xlsx]

## Sheet: Sheet
HXB2 Site
N130
N289
S291
G300
R336
Q337
K340
E344
R363
A372
T411
N413
T467
H651
K658
R683
